# Supplementary material for: Local Beneficial Microorganisms Impact Carbon and Nitrogen Mineralization in a Lixisol Incubated with Organic Waste Products
Source: MDPI journal article supplement (doi:10.3390/agronomy13112791), 2023-11-10
Supplement: s1 [file s1]

## Supplementary materials

### S1 Variations in cumulated C-CO<sub>2</sub> quantities of OWP expressed in gC-CO<sub>2</sub> 100 g<sup>-1</sup> of organic carbon of OWP (hypothesis 2)

The calculations for the Hypothesis 2 (Figure S1) were done as follows:

$$C_i^{\%} = \frac{oC_{si} - oC_s}{OC_i} \times 100$$

$$C_{ij}^{\%} = \frac{oC_{sij} - oC_{sj}}{OC_i} \times 100$$

Where  $C_i^{\%}$  is the cumulated carbon quantity (in gC-CO<sub>2</sub> 100 g<sup>-1</sup> of OC) emitted by the ith OWP;  $oC_{si}$  is the observed cumulated carbon quantity (on gC-CO<sub>2</sub>) emitted by the microcosm containing soil + ith OWP;  $oC_s$  is the observed cumulated carbon quantity (in gC-CO<sub>2</sub>) emitted by the microcosm containing soil alone;  $OC_i$  is the organic carbon quantity (in gOC) provided by the ith OWP;  $C_{ij}^{\%}$  is the cumulated carbon quantity (in gC-CO<sub>2</sub> 100 g<sup>-1</sup> of OC) emitted by the ith OWP and jth BM combination;  $oC_{sij}$  is the observed cumulated carbon quantity (in gC-CO<sub>2</sub>) emitted by the microcosm containing soil + ith OWP + jth BM;  $oC_{sj}$  is the observed cumulated carbon quantity (in gC-CO<sub>2</sub>) emitted by the microcosm containing soil + jth BM.

**Figure S1**

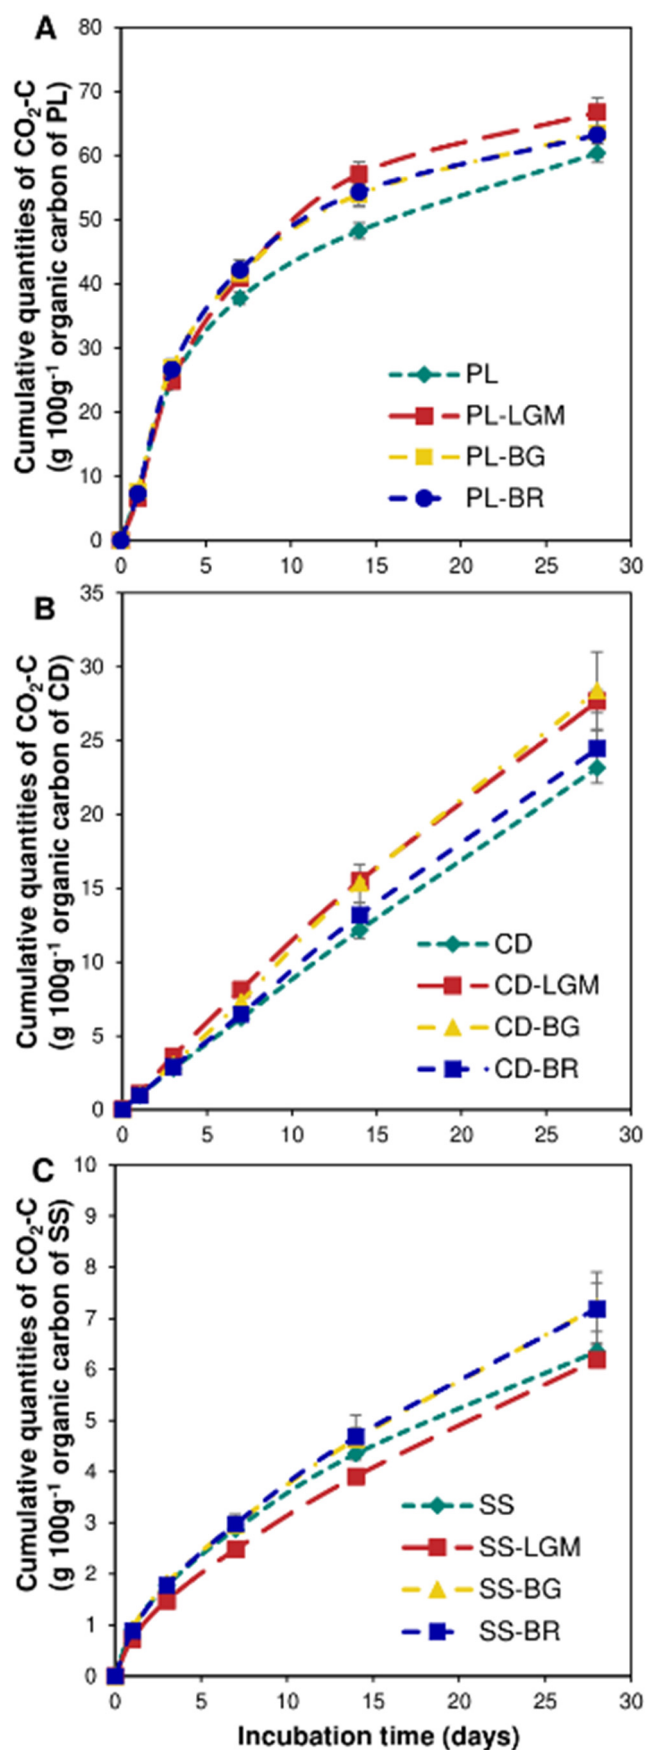

**Figure S1** Variations in cumulated C-CO<sub>2</sub> quantities of OWP expressed in gC-CO<sub>2</sub> 100 g<sup>-1</sup> of organic carbon of OWP (hypothesis 2). OWP organic waste products, BM local beneficial microorganisms, S soil, CD cow dung, PL poultry litter, SS sewage sludge, LGM groundnut + millet from Saint-Louis, BG

groundnut from the southern groundnut basin, BR rice from the southern groundnut basin. Error bars correspond to the standard deviation of three replicates

## S2 Impact of OWP or BM on microcosm dissolved organic carbon

A 15 ml volume of a soil:water suspension (1:5) filtered at 0.22  $\mu\text{m}$  and acidified with 2% ultrapure  $\text{HNO}_3$  was used. The dissolved organic carbon (DOC) of the microcosms and the control were measured using a Shimadzu TOC Analyzer.

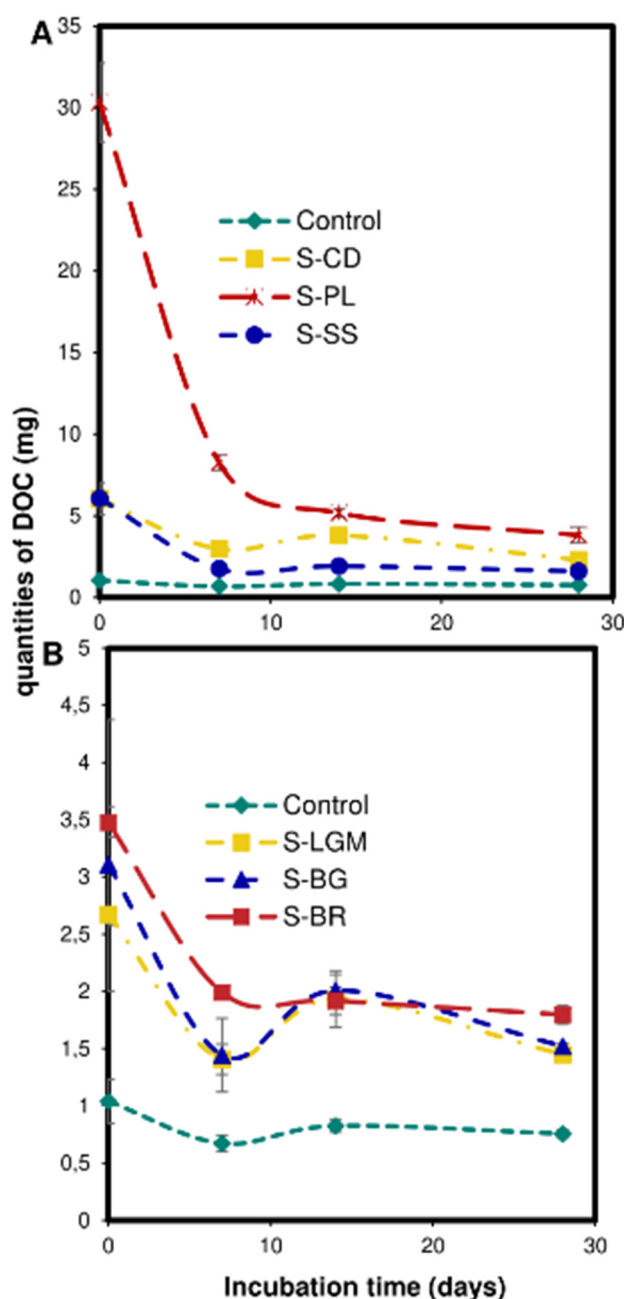

**Figure S2** Variations in DOC quantities in microcosms expressed in mgDOC. DOC dissolved organic carbon, S soil, CD cow dung, PL poultry litter, SS sewage sludge, LGM groundnut + millet from Saint-

Louis, BG groundnut from the southern groundnut basin, BR rice from the southern groundnut basin. Error bars correspond to the standard deviation of three replicates

OWP or BM input increased the microcosm DOC quantities (Figure S2). DOC quantities in the S-OWP and S-BM microcosms were significantly higher ( $p < 0.0001$ ) than in the control. Yet the DOC quantities in the S-OWP microcosms (Figure S2a) were higher than in the S-BM microcosms (Figure S2b). DOC quantities in the S-OWP and S-BM microcosms decreased with increasing incubation time. The S-OWP microcosms, according to their DOC quantities, were ranked as follows: S-PL > S-CD > S-SS ( $p < 0.0001$ , Figure S2a). S-BM microcosms, according to their DOC quantities, were ranked as follows: S-BR  $\geq$  S-BG = S-LGM ( $p < 0.0001$ , Figure S2b).

### S3. Impact of OWP or BM on microcosm pH

A soil:water suspension (1:5) was used to measure the pH of the microcosms and the control using a MultiLine® WTW Multi-parameter portable meter.

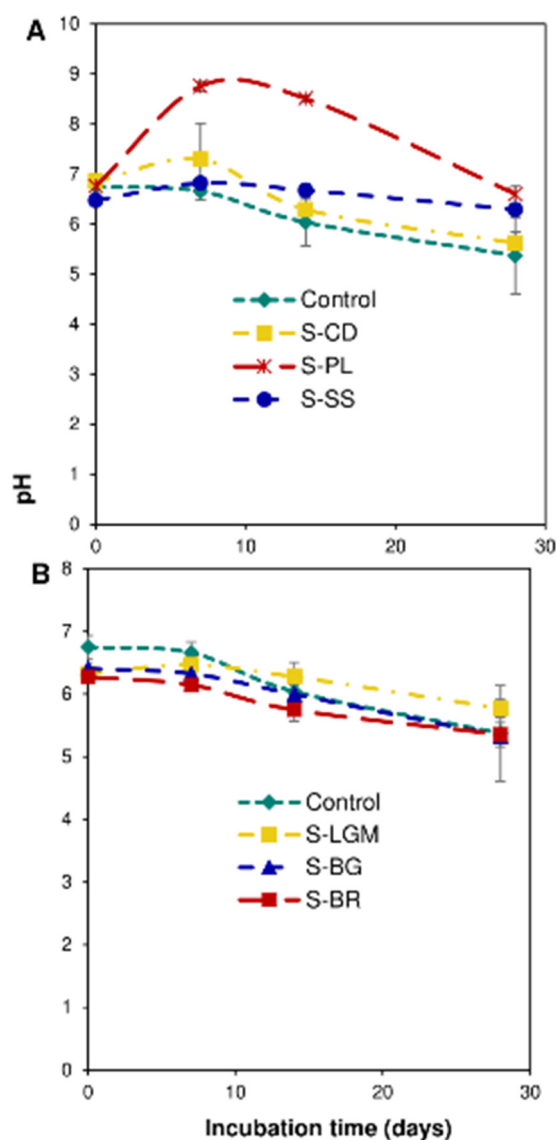

**Figure S3** Variations in microcosm pH. S soil, CD cow dung, PL poultry litter, SS sewage sludge, LGM groundnut + millet from Saint-Louis, BG groundnut from the southern groundnut basin, BR rice from the southern groundnut basin. Error bars correspond to the standard deviation of three replicates

PL input led to an increase in microcosm pH, which remained higher than that of the control, S-SS and S-CD microcosms ( $p < 0.01$ , Figure S3a). S-OWP microcosms, according to their pH, were ranked as follows: S-PL > S-CD = S-SS. BMs had no impact on the microcosm pH ( $p > 0.05$ , Figure S3b).

| Table S1a of Figure 1 A Cumulative quantities of C-CO <sub>2</sub> (mg) |            |                    |           | Table S1b of Figure 1 B Cumulative quantities of C-CO <sub>2</sub> (mg) |            |                   |           |
|-------------------------------------------------------------------------|------------|--------------------|-----------|-------------------------------------------------------------------------|------------|-------------------|-----------|
| Time (days)                                                             | Treatments | Means $\pm$ SD     | P value   | Time (days)                                                             | Treatments | Means $\pm$ SD    | P value   |
| 1                                                                       | Control    | 0,21 $\pm$ 0d      | 0,016*    | 1                                                                       | Control    | 0,21 $\pm$ 0,01c  | <0,001*** |
|                                                                         | S-CD       | 3,2 $\pm$ 0,07b    |           |                                                                         | S-LGM      | 0,73 $\pm$ 0,03a  |           |
|                                                                         | S-PL       | 20,55 $\pm$ 1,07a  |           |                                                                         | S-BG       | 0,34 $\pm$ 0,03b  |           |
|                                                                         | S-SS       | 2,39 $\pm$ 0,03c   |           |                                                                         | S-BR       | 0,35 $\pm$ 0,03b  |           |
| 3                                                                       | Control    | 0,6 $\pm$ 0,01d    | 0,016*    | 3                                                                       | Control    | 0,6 $\pm$ 0,01c   | <0,001*** |
|                                                                         | S-CD       | 9,45 $\pm$ 0,19b   |           |                                                                         | S-LGM      | 1,46 $\pm$ 0,06a  |           |
|                                                                         | S-PL       | 68,29 $\pm$ 1,85a  |           |                                                                         | S-BG       | 0,97 $\pm$ 0,08b  |           |
|                                                                         | S-SS       | 4,81 $\pm$ 0,08c   |           |                                                                         | S-BR       | 1 $\pm$ 0,09b     |           |
| 7                                                                       | Control    | 1,24 $\pm$ 0,02d   | <0,001*** | 7                                                                       | Control    | 1,24 $\pm$ 0,02c  | <0,001*** |
|                                                                         | S-CD       | 21,04 $\pm$ 0,1b   |           |                                                                         | S-LGM      | 2,51 $\pm$ 0,14a  |           |
|                                                                         | S-PL       | 104,68 $\pm$ 2,8a  |           |                                                                         | S-BG       | 2,13 $\pm$ 0,13b  |           |
|                                                                         | S-SS       | 8,06 $\pm$ 0,19c   |           |                                                                         | S-BR       | 2,26 $\pm$ 0,17b  |           |
| 14                                                                      | Control    | 2,11 $\pm$ 0,05d   | <0,001*** | 14                                                                      | Control    | 2,11 $\pm$ 0,05b  | <0,001*** |
|                                                                         | S-CD       | 41,04 $\pm$ 1,78b  |           |                                                                         | S-LGM      | 4,3 $\pm$ 0,25a   |           |
|                                                                         | S-PL       | 134,24 $\pm$ 3,42a |           |                                                                         | S-BG       | 3,89 $\pm$ 0,26a  |           |
|                                                                         | S-SS       | 12,44 $\pm$ 0,29c  |           |                                                                         | S-BR       | 4,27 $\pm$ 0,25a  |           |
| 28                                                                      | Control    | 3,33 $\pm$ 0,15d   | <0,001*** | 28                                                                      | Control    | 3,33 $\pm$ 0,15c  | <0,001*** |
|                                                                         | S-CD       | 77,39 $\pm$ 3,3b   |           |                                                                         | S-LGM      | 7,15 $\pm$ 0,42ab |           |
|                                                                         | S-PL       | 168,63 $\pm$ 4,02a |           |                                                                         | S-BG       | 6,57 $\pm$ 0,59b  |           |
|                                                                         | S-SS       | 18,41 $\pm$ 0,42c  |           |                                                                         | S-BR       | 7,54 $\pm$ 0,34a  |           |

Values followed by different letters in the same group are significantly different at the 5% threshold of test.

| Table S1c of Figure 1 C Cumulative quantities of C-CO <sub>2</sub> (g 100g <sup>-1</sup> organic carbon of OWP) |            |               |           | Table S1d of Figure 1 D Cumulative quantities of C-CO <sub>2</sub> (g 100g <sup>-1</sup> organic carbon of BM) |            |               |           |
|-----------------------------------------------------------------------------------------------------------------|------------|---------------|-----------|----------------------------------------------------------------------------------------------------------------|------------|---------------|-----------|
| Time (days)                                                                                                     | Treatments | Means ± SD    | P value   | Time (days)                                                                                                    | Treatments | Means ± SD    | P value   |
| 1                                                                                                               | S-CD       | 0,95 ± 0,02b  | <0,001*** | 1                                                                                                              | S-LGM      | 0,28 ± 0,018a | <0,001*** |
|                                                                                                                 | S-PL       | 7,51 ± 0,39a  |           |                                                                                                                | S-BG       | 0,06 ± 0,015c |           |
|                                                                                                                 | S-SS       | 0,93 ± 0,02b  |           |                                                                                                                | S-BR       | 0,11 ± 0,023b |           |
|                                                                                                                 |            |               |           |                                                                                                                |            |               |           |
| 3                                                                                                               | S-CD       | 2,8 ± 0,06b   | <0,001*** | 3                                                                                                              | S-LGM      | 0,45 ± 0,03a  | <0,01**   |
|                                                                                                                 | S-PL       | 25 ± 0,68a    |           |                                                                                                                | S-BG       | 0,17 ± 0,038c |           |
|                                                                                                                 | S-SS       | 1,8 ± 0,03c   |           |                                                                                                                | S-BR       | 0,31 ± 0,067b |           |
|                                                                                                                 |            |               |           |                                                                                                                |            |               |           |
| 7                                                                                                               | S-CD       | 6,26 ± 0,03b  | <0,001*** | 7                                                                                                              | S-LGM      | 0,68 ± 0,074a | <0,01**   |
|                                                                                                                 | S-PL       | 38,21 ± 1,03a |           |                                                                                                                | S-BG       | 0,43 ± 0,061b |           |
|                                                                                                                 | S-SS       | 2,91 ± 0,08c  |           |                                                                                                                | S-BR       | 0,8 ± 0,13a   |           |
|                                                                                                                 |            |               |           |                                                                                                                |            |               |           |
| 14                                                                                                              | S-CD       | 12,3 ± 0,56b  | <0,001*** | 14                                                                                                             | S-LGM      | 1,16 ± 0,131b | <0,01**   |
|                                                                                                                 | S-PL       | 48,8 ± 1,26a  |           |                                                                                                                | S-BG       | 0,84 ± 0,122c |           |
|                                                                                                                 | S-SS       | 4,41 ± 0,12c  |           |                                                                                                                | S-BR       | 1,68 ± 0,197a |           |
|                                                                                                                 |            |               |           |                                                                                                                |            |               |           |
| 28                                                                                                              | S-CD       | 23,4 ± 1,04b  | <0,001*** | 28                                                                                                             | S-LGM      | 2,03 ± 0,221b | <0,001*** |
|                                                                                                                 | S-PL       | 61,05 ± 1,48a |           |                                                                                                                | S-BG       | 1,53 ± 0,281b |           |
|                                                                                                                 | S-SS       | 6,43 ± 0,18c  |           |                                                                                                                | S-BR       | 3,28 ± 0,268a |           |

Values followed by different letters in the same group are significantly different at the 5% threshold of test.

| Table S2a of Figure 2 A Cumulative quantities of C-CO <sub>2</sub> (mg) |                   |                |         |
|-------------------------------------------------------------------------|-------------------|----------------|---------|
| Time (days)                                                             | Treatments        | Means ± SD     | P value |
| 1                                                                       | PL-LGM observed   | 18,71 ± 0,78a  | 0,053   |
|                                                                         | PL-LGM calculated | 20,87 ± 1,08a  |         |
| 3                                                                       | PL-LGM observed   | 68,87 ± 2,04a  | 0,848   |
|                                                                         | PL-LGM calculated | 68,55 ± 1,9a   |         |
| 7                                                                       | PL-LGM observed   | 113,27 ± 3,38a | 0,03*   |
|                                                                         | PL-LGM calculated | 104,72 ± 2,88b |         |
| 14                                                                      | PL-LGM observed   | 158,36 ± 5,52a | <0,01** |
|                                                                         | PL-LGM calculated | 134,32 ± 3,51b |         |
| 28                                                                      | PL-LGM observed   | 186,51 ± 6,37  | 0,022*  |
|                                                                         | PL-LGM calculated | 169,11 ± 4,09  |         |

| Table S2b of Figure 2 B Cumulative quantities of C-CO <sub>2</sub> (mg) |                  |                |         |
|-------------------------------------------------------------------------|------------------|----------------|---------|
| Time (days)                                                             | Treatments       | Means ± SD     | P value |
| 1                                                                       | PL-BG observed   | 21,31 ± 0,86a  | 0,351   |
|                                                                         | PL-BG calculated | 20,47 ± 1,05a  |         |
| 3                                                                       | PL-BG observed   | 74,3 ± 3,45a   | 0,069   |
|                                                                         | PL-BG calculated | 68,05 ± 1,82a  |         |
| 7                                                                       | PL-BG observed   | 114,74 ± 2,70a | <0,01** |
|                                                                         | PL-BG calculated | 104,34 ± 2,72b |         |
| 14                                                                      | PL-BG observed   | 149,38 ± 4,65a | 0,011*  |
|                                                                         | PL-BG calculated | 133,91 ± 3,21b |         |
| 28                                                                      | PL-BG observed   | 177,2 ± 9,93a  | 0,266   |
|                                                                         | PL-BG calculated | 168,53 ± 3,43a |         |

| Table S2c of Figure 2 C Cumulative quantities of C-CO <sub>2</sub> (mg) |                  |                |         |
|-------------------------------------------------------------------------|------------------|----------------|---------|
| Time (days)                                                             | Treatments       | Means ± SD     | P value |
| 1                                                                       | PL-BR observed   | 20,19 ± 1,36a  | 0,781   |
|                                                                         | PL-BR calculated | 20,48 ± 1,05a  |         |
| 3                                                                       | PL-BR observed   | 73,46 ± 2,04a  | 0,03*   |
|                                                                         | PL-BR calculated | 68,09 ± 1,92b  |         |
| 7                                                                       | PL-BR observed   | 116,46 ± 4,38a | 0,021*  |
|                                                                         | PL-BR calculated | 104,47 ± 2,94b |         |
| 14                                                                      | PL-BR observed   | 150,84 ± 6,33a | 0,026*  |
|                                                                         | PL-BR calculated | 134,28 ± 3,61b |         |
| 28                                                                      | PL-BR observed   | 177,26 ± 9,68a | 0,300   |
|                                                                         | PL-BR calculated | 169,5 ± 4,22a  |         |

| Table S2d of Figure 2 D Cumulative quantities of C-CO <sub>2</sub> (mg) |                   |               |           |
|-------------------------------------------------------------------------|-------------------|---------------|-----------|
| Time (days)                                                             | Treatments        | Means ± SD    | P value   |
| 1                                                                       | CD-LGM observed   | 3,98 ± 0,08a  | <0,01**   |
|                                                                         | CD-LGM calculated | 3,52 ± 0,1b   |           |
| 3                                                                       | CD-LGM observed   | 12,38 ± 0,27a | <0,001*** |
|                                                                         | CD-LGM calculated | 9,70 ± 0,23b  |           |
| 7                                                                       | CD-LGM observed   | 27,23 ± 0,81a | <0,001*** |
|                                                                         | CD-LGM calculated | 21,08 ± 0,05b |           |
| 14                                                                      | CD-LGM observed   | 51,74 ± 1,16a | <0,001*** |
|                                                                         | CD-LGM calculated | 41,12 ± 1,55b |           |
| 28                                                                      | CD-LGM observed   | 92,29 ± 2,55a | <0,01**   |
|                                                                         | CD-LGM calculated | 77,87 ± 2,89b |           |

Values followed by different letters in the same group are significantly different at the 5% threshold of test.

| Table S2e of Figure 2 E Cumulative quantities of C-CO <sub>2</sub> (mg) |                  |               |         |
|-------------------------------------------------------------------------|------------------|---------------|---------|
| Time (days)                                                             | Treatments       | Means ± SD    | P value |
| 1                                                                       | CD-BG observed   | 3,29 ± 0,1a   | 0,056   |
|                                                                         | CD-BG calculated | 3,12 ± 0,04a  |         |
|                                                                         |                  |               |         |
| 3                                                                       | CD-BG observed   | 10,19 ± 0,22a | <0,01** |
|                                                                         | CD-BG calculated | 9,21 ± 0,15b  |         |
|                                                                         |                  |               |         |
| 7                                                                       | CD-BG observed   | 24,3 ± 1,26a  | 0,038*  |
|                                                                         | CD-BG calculated | 20,7 ± 0,11b  |         |
|                                                                         |                  |               |         |
| 14                                                                      | CD-BG observed   | 50,85 ± 4,2a  | 0,037*  |
|                                                                         | CD-BG calculated | 40,71 ± 1,8b  |         |
|                                                                         |                  |               |         |
| 28                                                                      | CD-BG observed   | 94,06 ± 8,44a | 0,033*  |
|                                                                         | CD-BG calculated | 77,29 ± 3,46b |         |

| Table S2h of Figure 2 H Cumulative quantities of C-CO <sub>2</sub> (mg) |                  |               |         |
|-------------------------------------------------------------------------|------------------|---------------|---------|
| Time (days)                                                             | Treatments       | Means ± SD    | P value |
| 1                                                                       | SS-BG observed   | 2,33 ± 0,05a  | 0,728   |
|                                                                         | SS-BG calculated | 2,31 ± 0,06a  |         |
|                                                                         |                  |               |         |
| 3                                                                       | SS-BG observed   | 4,68 ± 0,08a  | 0,286   |
|                                                                         | SS-BG calculated | 4,57 ± 0,13a  |         |
|                                                                         |                  |               |         |
| 7                                                                       | SS-BG observed   | 7,95 ± 0,22a  | 0,270   |
|                                                                         | SS-BG calculated | 7,72 ± 0,23a  |         |
|                                                                         |                  |               |         |
| 14                                                                      | SS-BG observed   | 12,79 ± 0,52a | 0,153   |
|                                                                         | SS-BG calculated | 12,11 ± 0,40a |         |
|                                                                         |                  |               |         |
| 28                                                                      | SS-BG observed   | 20,36 ± 1,12a | 0,049*  |
|                                                                         | SS-BG calculated | 18,31 ± 0,78b |         |

Values followed by different letters in the same group are significantly different at the 5% threshold of test.



| Table S3a of Figure 3 A Cumulative quantities of C-CO <sub>2</sub> (g 100g <sup>-1</sup> organic carbon of PL) |            |                |         | Table S3b of Figure 3 B Cumulative quantities of C-CO <sub>2</sub> (g 100g <sup>-1</sup> organic carbon of CD) |            |                |           |
|----------------------------------------------------------------------------------------------------------------|------------|----------------|---------|----------------------------------------------------------------------------------------------------------------|------------|----------------|-----------|
| Time (days)                                                                                                    | Treatments | Means ± SD     | P value | Time (days)                                                                                                    | Treatments | Means ± SD     | P value   |
| 1                                                                                                              | PL         | 7,44 ± 0,39a   | 0,084   | 1                                                                                                              | CD         | 0,94 ± 0,02c   | <0,001*** |
|                                                                                                                | PL-LGM     | 6,84 ± 0,29a   |         |                                                                                                                | CD-LGM     | 1,25 ± 0,02a   |           |
|                                                                                                                | PL-BG      | 7,79 ± 0,32a   |         |                                                                                                                | CD-BG      | 1,03 ± 0,03b   |           |
|                                                                                                                | PL-BR      | 7,38 ± 0,5a    |         |                                                                                                                | CD-BR      | 1 ± 0,06bc     |           |
| 3                                                                                                              | PL         | 24,74 ± 0,68b  | 0,024*  | 3                                                                                                              | CD         | 2,77 ± 0,06c   | <0,001*** |
|                                                                                                                | PL-LGM     | 25,17 ± 0,74ab |         |                                                                                                                | CD-LGM     | 3,87 ± 0,09a   |           |
|                                                                                                                | PL-BG      | 27,16 ± 1,26a  |         |                                                                                                                | CD-BG      | 3,18 ± 0,07b   |           |
|                                                                                                                | PL-BR      | 26,85 ± 0,75a  |         |                                                                                                                | CD-BR      | 3 ± 0,16b      |           |
| 7                                                                                                              | PL         | 37,81 ± 1,02b  | <0,01** | 7                                                                                                              | CD         | 6,19 ± 0,03c   | <0,001*** |
|                                                                                                                | PL-LGM     | 41,4 ± 1,23a   |         |                                                                                                                | CD-LGM     | 8,52 ± 0,25a   |           |
|                                                                                                                | PL-BG      | 41,93 ± 0,99a  |         |                                                                                                                | CD-BG      | 7,6 ± 0,39b    |           |
|                                                                                                                | PL-BR      | 42,56 ± 1,6a   |         |                                                                                                                | CD-BR      | 6,76 ± 0,41c   |           |
| 14                                                                                                             | PL         | 48,29 ± 1,25b  | <0,01** | 14                                                                                                             | CD         | 12,17 ± 0,56c  | <0,001*** |
|                                                                                                                | PL-LGM     | 57,88 ± 2,02a  |         |                                                                                                                | CD-LGM     | 16,18 ± 0,36a  |           |
|                                                                                                                | PL-BG      | 54,59 ± 1,7a   |         |                                                                                                                | CD-BG      | 15,9 ± 1,31a   |           |
|                                                                                                                | PL-BR      | 55,13 ± 2,31a  |         |                                                                                                                | CD-BR      | 13,85 ± 0,86b  |           |
| 28                                                                                                             | PL         | 60,41 ± 1,47b  | 0,063   | 28                                                                                                             | CD         | 23,15 ± 1,03b  | <0,01**   |
|                                                                                                                | PL-LGM     | 68,16 ± 2,33a  |         |                                                                                                                | CD-LGM     | 28,85 ± 0,8a   |           |
|                                                                                                                | PL-BG      | 64,76 ± 3,63ab |         |                                                                                                                | CD-BG      | 29,41 ± 2,64a  |           |
|                                                                                                                | PL-BR      | 64,78 ± 3,54ab |         |                                                                                                                | CD-BR      | 25,76 ± 1,22ab |           |

Values followed by different letters in the same group are significantly different at the 5% threshold of test.

| Table S3c of Figure 3 C Cumulative quantities of C-CO <sub>2</sub> (g 100g <sup>-1</sup> organic carbon of SS) |            |               |           |
|----------------------------------------------------------------------------------------------------------------|------------|---------------|-----------|
| Time (days)                                                                                                    | Treatments | Means ± SD    | P value   |
| 1                                                                                                              | SS         | 0,92 ± 0,01b  | 0,023*    |
|                                                                                                                | SS-LGM     | 0,95 ± 0,01ab |           |
|                                                                                                                | SS-BG      | 0,98 ± 0,02a  |           |
|                                                                                                                | SS-BR      | 0,95 ± 0,02ab |           |
|                                                                                                                |            |               |           |
| 3                                                                                                              | SS         | 1,77 ± 0,03b  | 0,003**   |
|                                                                                                                | SS-LGM     | 1,84 ± 0,03b  |           |
|                                                                                                                | SS-BG      | 1,97 ± 0,04a  |           |
|                                                                                                                | SS-BR      | 1,95 ± 0,08a  |           |
|                                                                                                                |            |               |           |
| 7                                                                                                              | SS         | 2,87 ± 0,08b  | <0,01**   |
|                                                                                                                | SS-LGM     | 3,02 ± 0,06b  |           |
|                                                                                                                | SS-BG      | 3,35 ± 0,09a  |           |
|                                                                                                                | SS-BR      | 3,41 ± 0,19a  |           |
|                                                                                                                |            |               |           |
| 14                                                                                                             | SS         | 4,35 ± 0,12c  | <0,01**   |
|                                                                                                                | SS-LGM     | 4,83 ± 0,08b  |           |
|                                                                                                                | SS-BG      | 5,38 ± 0,22a  |           |
|                                                                                                                | SS-BR      | 5,59 ± 0,41a  |           |
|                                                                                                                |            |               |           |
| 28                                                                                                             | SS         | 6,35 ± 0,18c  | <0,001*** |
|                                                                                                                | SS-LGM     | 7,8 ± 0,12b   |           |
|                                                                                                                | SS-BG      | 8,58 ± 0,47ab |           |
|                                                                                                                | SS-BR      | 8,96 ± 0,72a  |           |

Values followed by different letters in the same group are significantly different at the 5% threshold of test.

| Table S4a of Figure 4 A Quantities of mineral nitrogen (mg) |            |                     |           | Table S4b of Figure 4 B Quantities of mineral nitrogen (mg) |            |                    |           |
|-------------------------------------------------------------|------------|---------------------|-----------|-------------------------------------------------------------|------------|--------------------|-----------|
| Time (days)                                                 | Treatments | Means $\pm$ SD      | P value   | Time (days)                                                 | Treatments | Means $\pm$ SD     | P value   |
| 1                                                           | Control    | 0,038 $\pm$ 0,005c  | <0,001*** | 1                                                           | Control    | 0,038 $\pm$ 0,005c | 0,016*    |
|                                                             | S-CD       | 0,003 $\pm$ 0,012c  |           |                                                             | S-LGM      | 0,832 $\pm$ 0,009a |           |
|                                                             | S-PL       | 1,314 $\pm$ 0,065a  |           |                                                             | S-BG       | -0,14 $\pm$ 0,016d |           |
|                                                             | S-SS       | 0,282 $\pm$ 0,005b  |           |                                                             | S-BR       | 0,054 $\pm$ 0,01b  |           |
|                                                             |            |                     |           |                                                             |            |                    |           |
| 3                                                           | Control    | 0,222 $\pm$ 0,035c  | <0,001*** | 3                                                           | Control    | 0,222 $\pm$ 0,035c | <0,001*** |
|                                                             | S-CD       | 0,018 $\pm$ 0,06d   |           |                                                             | S-LGM      | 0,968 $\pm$ 0,061a |           |
|                                                             | S-PL       | 2,07 $\pm$ 0,168a   |           |                                                             | S-BG       | 0,583 $\pm$ 0,011b |           |
|                                                             | S-SS       | 1,049 $\pm$ 0,016b  |           |                                                             | S-BR       | 0,218 $\pm$ 0,037c |           |
|                                                             |            |                     |           |                                                             |            |                    |           |
| 7                                                           | Control    | 0,567 $\pm$ 0,033c  | <0,001*** | 7                                                           | Control    | 0,567 $\pm$ 0,033b | <0,001*** |
|                                                             | S-CD       | 0,447 $\pm$ 0,019d  |           |                                                             | S-LGM      | 1,458 $\pm$ 0,081a |           |
|                                                             | S-PL       | 1,494 $\pm$ 0,056b  |           |                                                             | S-BG       | 0,474 $\pm$ 0,008c |           |
|                                                             | S-SS       | 2,372 $\pm$ 0,035a  |           |                                                             | S-BR       | 0,357 $\pm$ 0,003d |           |
|                                                             |            |                     |           |                                                             |            |                    |           |
| 14                                                          | Control    | 1,063 $\pm$ 0,011b  | <0,001*** | 14                                                          | Control    | 1,063 $\pm$ 0,011c | <0,001*** |
|                                                             | S-CD       | 0,416 $\pm$ 0,012d  |           |                                                             | S-LGM      | 2,657 $\pm$ 0,027a |           |
|                                                             | S-PL       | 0,762 $\pm$ 0,008c  |           |                                                             | S-BG       | 1,364 $\pm$ 0,041b |           |
|                                                             | S-SS       | 3,909 $\pm$ 0,184a  |           |                                                             | S-BR       | 0,855 $\pm$ 0,025d |           |
|                                                             |            |                     |           |                                                             |            |                    |           |
| 28                                                          | Control    | 1,427 $\pm$ 0,017b  | <0,001*** | 28                                                          | Control    | 1,427 $\pm$ 0,017b | <0,001*** |
|                                                             | S-CD       | -0,153 $\pm$ 0,002d |           |                                                             | S-LGM      | 2,598 $\pm$ 0,169a |           |
|                                                             | S-PL       | 1,055 $\pm$ 0,046c  |           |                                                             | S-BG       | 0,912 $\pm$ 0,011c |           |
|                                                             | S-SS       | 4,049 $\pm$ 0,032a  |           |                                                             | S-BR       | 0,597 $\pm$ 0,015d |           |

Values followed by different letters in the same group are significantly different at the 5% threshold of test.

| Table S4c of Figure 4 C Net quantities of mineral nitrogen (g 100g <sup>-1</sup> organic nitrogen of OWP) |            |                 |           | Table S4d of Figure 4 D Net quantities of mineral nitrogen (g 100g <sup>-1</sup> organic nitrogen of BM) |            |                  |           |
|-----------------------------------------------------------------------------------------------------------|------------|-----------------|-----------|----------------------------------------------------------------------------------------------------------|------------|------------------|-----------|
| Time (days)                                                                                               | Treatments | Means ± SD      | P value   | Time (days)                                                                                              | Treatments | Means ± SD       | P value   |
| 1                                                                                                         | S-CD       | -0,172 ± 0,061c | <0,001*** | 1                                                                                                        | S-LGM      | 17,636 ± 2,011a  | <0,001*** |
|                                                                                                           | S-PL       | 2,079 ± 0,138a  |           |                                                                                                          | S-BG       | -3,147 ± 0,294c  |           |
|                                                                                                           | S-SS       | 0,965 ± 0,023b  |           |                                                                                                          | S-BR       | 0,493 ± 0,29b    |           |
|                                                                                                           |            |                 |           |                                                                                                          |            |                  |           |
| 3                                                                                                         | S-CD       | -1,033 ± 0,304b | <0,001*** | 3                                                                                                        | S-LGM      | 16,582 ± 2,644a  | <0,001*** |
|                                                                                                           | S-PL       | 3,009 ± 0,27a   |           |                                                                                                          | S-BG       | 6,386 ± 0,204b   |           |
|                                                                                                           | S-SS       | 3,268 ± 0,062a  |           |                                                                                                          | S-BR       | -0,148 ± 1,105c  |           |
|                                                                                                           |            |                 |           |                                                                                                          |            |                  |           |
| 7                                                                                                         | S-CD       | -0,605 ± 0,093c | <0,001*** | 7                                                                                                        | S-LGM      | 19,734 ± 2,335a  | <0,001*** |
|                                                                                                           | S-PL       | 1,51 ± 0,105b   |           |                                                                                                          | S-BG       | -1,654 ± 0,147b  |           |
|                                                                                                           | S-SS       | 7,134 ± 0,165a  |           |                                                                                                          | S-BR       | -6,363 ± 0,155c  |           |
|                                                                                                           |            |                 |           |                                                                                                          |            |                  |           |
| 14                                                                                                        | S-CD       | -3,263 ± 0,062c | <0,001*** | 14                                                                                                       | S-LGM      | 35,344 ± 3,661a  | <0,001*** |
|                                                                                                           | S-PL       | -0,49 ± 0,006b  |           |                                                                                                          | S-BG       | 5,313 ± 0,687b   |           |
|                                                                                                           | S-SS       | 11,246 ± 0,686a |           |                                                                                                          | S-BR       | -6,298 ± 0,911c  |           |
|                                                                                                           |            |                 |           |                                                                                                          |            |                  |           |
| 28                                                                                                        | S-CD       | -7,961 ± 0,04c  | <0,001*** | 28                                                                                                       | S-LGM      | 25,72 ± 1,388a   | <0,001*** |
|                                                                                                           | S-PL       | -0,604 ± 0,067b |           |                                                                                                          | S-BG       | -9,115 ± 0,245b  |           |
|                                                                                                           | S-SS       | 10,366 ± 0,125a |           |                                                                                                          | S-BR       | -25,083 ± 0,934c |           |

Values followed by different letters in the same group are significantly different at the 5% threshold of test.

| Table S5a of Figure 5 A Net quantities of mineral nitrogen (mg) |                   |                     |           |
|-----------------------------------------------------------------|-------------------|---------------------|-----------|
| Time (days)                                                     | Treatments        | Means $\pm$ SD      | P value   |
| 1                                                               | PL-LGM observed   | 2,224 $\pm$ 0,033a  | 0,047*    |
|                                                                 | PL-LGM calculated | 2,071 $\pm$ 0,071b  |           |
| 3                                                               | PL-LGM observed   | 0,11 $\pm$ 0,59b    | 0,01*     |
|                                                                 | PL-LGM calculated | 2,593 $\pm$ 0,219a  |           |
| 7                                                               | PL-LGM observed   | 0,822 $\pm$ 0,056b  | <0,001*** |
|                                                                 | PL-LGM calculated | 1,818 $\pm$ 0,11a   |           |
| 14                                                              | PL-LGM observed   | 2,877 $\pm$ 0,024a  | <0,001*** |
|                                                                 | PL-LGM calculated | 1,293 $\pm$ 0,024b  |           |
| 28                                                              | PL-LGM observed   | 11,248 $\pm$ 0,042a | <0,001*** |
|                                                                 | PL-LGM calculated | 0,8 $\pm$ 0,212b    |           |

| Table S5b of Figure 5 B Net quantities of mineral nitrogen (mg) |                  |                     |           |
|-----------------------------------------------------------------|------------------|---------------------|-----------|
| Time (days)                                                     | Treatments       | Means $\pm$ SD      | P value   |
| 1                                                               | PL-BG observed   | 1,275 $\pm$ 0,022a  | 0,020*    |
|                                                                 | PL-BG calculated | 1,098 $\pm$ 0,055b  |           |
| 3                                                               | PL-BG observed   | 1,769 $\pm$ 0,081b  | 0,034*    |
|                                                                 | PL-BG calculated | 2,208 $\pm$ 0,178a  |           |
| 7                                                               | PL-BG observed   | 1,151 $\pm$ 0,029a  | <0,01**   |
|                                                                 | PL-BG calculated | 0,833 $\pm$ 0,048b  |           |
| 14                                                              | PL-BG observed   | 0,707 $\pm$ 0,04a   | <0,001*** |
|                                                                 | PL-BG calculated | 0 $\pm$ 0,033b      |           |
| 28                                                              | PL-BG observed   | 5,159 $\pm$ 0,125a  | <0,001*** |
|                                                                 | PL-BG calculated | -0,886 $\pm$ 0,042b |           |

| Table S5c of Figure 5 C Net quantities of mineral nitrogen (mg) |                  |                     |           |
|-----------------------------------------------------------------|------------------|---------------------|-----------|
| Time (days)                                                     | Treatments       | Means $\pm$ SD      | P value   |
| 1                                                               | PL-BR observed   | 1,333 $\pm$ 0,013a  | 0,430     |
|                                                                 | PL-BR calculated | 1,293 $\pm$ 0,071a  |           |
| 3                                                               | PL-BR observed   | 2,232 $\pm$ 0,093a  | 0,042*    |
|                                                                 | PL-BR calculated | 1,844 $\pm$ 0,175b  |           |
| 7                                                               | PL-BR observed   | 1,676 $\pm$ 0,064a  | <0,001*** |
|                                                                 | PL-BR calculated | 0,716 $\pm$ 0,057b  |           |
| 14                                                              | PL-BR observed   | 0,455 $\pm$ 0,011a  | <0,001*** |
|                                                                 | PL-BR calculated | -0,509 $\pm$ 0,033b |           |
| 28                                                              | PL-BR observed   | 3,154 $\pm$ 0,091a  | <0,001*** |
|                                                                 | PL-BR calculated | -1,2 $\pm$ 0,058b   |           |

| Table S5d of Figure 5 D Net quantities of mineral nitrogen (mg) |                   |                     |           |
|-----------------------------------------------------------------|-------------------|---------------------|-----------|
| Time (days)                                                     | Treatments        | Means $\pm$ SD      | P value   |
| 1                                                               | CD-LGM observed   | 0,252 $\pm$ 0,03b   | <0,001*** |
|                                                                 | CD-LGM calculated | 0,761 $\pm$ 0,007a  |           |
| 3                                                               | CD-LGM observed   | -0,549 $\pm$ 0,184b | <0,001*** |
|                                                                 | CD-LGM calculated | 0,541 $\pm$ 0,119a  |           |
| 7                                                               | CD-LGM observed   | -1,239 $\pm$ 0,057b | <0,001*** |
|                                                                 | CD-LGM calculated | 0,771 $\pm$ 0,077a  |           |
| 14                                                              | CD-LGM observed   | -2,089 $\pm$ 0,019b | <0,001*** |
|                                                                 | CD-LGM calculated | 0,947 $\pm$ 0,03a   |           |
| 28                                                              | CD-LGM observed   | -3 $\pm$ 0,016b     | <0,001*** |
|                                                                 | CD-LGM calculated | -0,408 $\pm$ 0,169a |           |

Values followed by different letters in the same group are significantly different at the 5% threshold of test.

| Table S5e of Figure 5 E Net quantities of mineral nitrogen (mg) |                  |                     |           |
|-----------------------------------------------------------------|------------------|---------------------|-----------|
| Time (days)                                                     | Treatments       | Means $\pm$ SD      | P value   |
| 1                                                               | CD-BG observed   | -0,088 $\pm$ 0,024a | <0,01**   |
|                                                                 | CD-BG calculated | -0,212 $\pm$ 0,026b |           |
| 3                                                               | CD-BG observed   | -0,263 $\pm$ 0,054b | <0,01**   |
|                                                                 | CD-BG calculated | 0,156 $\pm$ 0,069a  |           |
| 7                                                               | CD-BG observed   | -0,674 $\pm$ 0,01b  | <0,001*** |
|                                                                 | CD-BG calculated | -0,213 $\pm$ 0,014a |           |
| 14                                                              | CD-BG observed   | -0,67 $\pm$ 0,019b  | <0,001*** |
|                                                                 | CD-BG calculated | -0,347 $\pm$ 0,052a |           |
| 28                                                              | CD-BG observed   | -2,015 $\pm$ 0,007a | <0,001*** |
|                                                                 | CD-BG calculated | -2,094 $\pm$ 0,012b |           |

| Table S5f of Figure 5 F Net quantities of mineral nitrogen (mg) |                  |                     |           |
|-----------------------------------------------------------------|------------------|---------------------|-----------|
| Time (days)                                                     | Treatments       | Means $\pm$ SD      | P value   |
| 1                                                               | CD-BR observed   | -0,086 $\pm$ 0,006b | <0,001*** |
|                                                                 | CD-BR calculated | -0,018 $\pm$ 0,006a |           |
| 3                                                               | CD-BR observed   | -0,193 $\pm$ 0,097a | 0,849     |
|                                                                 | CD-BR calculated | -0,209 $\pm$ 0,094a |           |
| 7                                                               | CD-BR observed   | -0,414 $\pm$ 0,003b | <0,01**   |
|                                                                 | CD-BR calculated | -0,33 $\pm$ 0,019a  |           |
| 14                                                              | CD-BR observed   | 2,821 $\pm$ 0,014a  | <0,001*** |
|                                                                 | CD-BR calculated | -0,855 $\pm$ 0,013b |           |
| 28                                                              | CD-BR observed   | -1,57 $\pm$ 0,002a  | <0,001*** |
|                                                                 | CD-BR calculated | -2,408 $\pm$ 0,014b |           |

| Table S5g of Figure 5 G Net quantities of mineral nitrogen (mg) |                   |                     |           |
|-----------------------------------------------------------------|-------------------|---------------------|-----------|
| Time (days)                                                     | Treatments        | Means $\pm$ SD      | P value   |
| 1                                                               | SS-LGM observed   | 0,491 $\pm$ 0,069b  | <0,01**   |
|                                                                 | SS-LGM calculated | 1,039 $\pm$ 0,014a  |           |
| 3                                                               | SS-LGM observed   | -0,259 $\pm$ 0,017b | <0,001*** |
|                                                                 | SS-LGM calculated | 1,572 $\pm$ 0,046a  |           |
| 7                                                               | SS-LGM observed   | 0,71 $\pm$ 0,024b   | <0,001*** |
|                                                                 | SS-LGM calculated | 2,696 $\pm$ 0,088a  |           |
| 14                                                              | SS-LGM observed   | 4,121 $\pm$ 0,22a   | 0,134     |
|                                                                 | SS-LGM calculated | 4,44 $\pm$ 0,193a   |           |
| 28                                                              | SS-LGM observed   | 1,649 $\pm$ 0,108b  | <0,001*** |
|                                                                 | SS-LGM calculated | 3,794 $\pm$ 0,177a  |           |

| Table S5h of Figure 5 H Net quantities of mineral nitrogen (mg) |                  |                    |           |
|-----------------------------------------------------------------|------------------|--------------------|-----------|
| Time (days)                                                     | Treatments       | Means $\pm$ SD     | P value   |
| 1                                                               | SS-BG observed   | 0,818 $\pm$ 0,02a  | <0,001*** |
|                                                                 | SS-BG calculated | 0,066 $\pm$ 0,012b |           |
| 3                                                               | SS-BG observed   | 0,377 $\pm$ 0,016b | <0,001*** |
|                                                                 | SS-BG calculated | 1,188 $\pm$ 0,006a |           |
| 7                                                               | SS-BG observed   | 0,429 $\pm$ 0,013b | <0,001*** |
|                                                                 | SS-BG calculated | 1,712 $\pm$ 0,042a |           |
| 14                                                              | SS-BG observed   | 1,876 $\pm$ 0,092b | <0,01**   |
|                                                                 | SS-BG calculated | 3,146 $\pm$ 0,164a |           |
| 28                                                              | SS-BG observed   | 5,306 $\pm$ 0,027a | <0,001*** |
|                                                                 | SS-BG calculated | 2,108 $\pm$ 0,038b |           |

Values followed by different letters in the same group are significantly different at the 5% threshold of test.

| Table S5i of Figure 5 I Net quantities of mineral nitrogen (mg) |                  |                |           |
|-----------------------------------------------------------------|------------------|----------------|-----------|
| Time (days)                                                     | Treatments       | Means ± SD     | P value   |
| 1                                                               | SS-BR observed   | 0,336 ± 0,015a | <0,01**   |
|                                                                 | SS-BR calculated | 0,261 ± 0,015b |           |
|                                                                 |                  |                |           |
| 3                                                               | SS-BR observed   | 0,532 ± 0,025b | <0,001*** |
|                                                                 | SS-BR calculated | 0,823 ± 0,027a |           |
|                                                                 |                  |                |           |
| 7                                                               | SS-BR observed   | 0,567 ± 0,036b | <0,001*** |
|                                                                 | SS-BR calculated | 1,595 ± 0,034a |           |
|                                                                 |                  |                |           |
| 14                                                              | SS-BR observed   | 1,117 ± 0,01b  | <0,01**   |
|                                                                 | SS-BR calculated | 2,638 ± 0,204a |           |
|                                                                 |                  |                |           |
| 28                                                              | SS-BR observed   | 2,142 ± 0,064a | <0,01**   |
|                                                                 | SS-BR calculated | 1,794 ± 0,034b |           |

Values followed by different letters in the same group are significantly different at the 5% threshold of test.

| Table S6a of Figure 6 A Net quantities of mineral nitrogen (g 100g <sup>-1</sup> organic nitrogen of PL and BM) |            |                 |           | Table S6b of Figure 6 B Net quantities of mineral nitrogen (g 100g <sup>-1</sup> organic nitrogen of CD and BM) |            |                  |           |
|-----------------------------------------------------------------------------------------------------------------|------------|-----------------|-----------|-----------------------------------------------------------------------------------------------------------------|------------|------------------|-----------|
| Time (days)                                                                                                     | Treatments | Means ± SD      | P value   | Time (days)                                                                                                     | Treatments | Means ± SD       | P value   |
| 1                                                                                                               | PL         | 2,079 ± 0,138b  | <0,001*** | 1                                                                                                               | CD         | -0,172 ± 0,061b  | <0,001*** |
|                                                                                                                 | PL-LGM     | 3,358 ± 0,037a  |           |                                                                                                                 | CD-LGM     | 1,039 ± 0,127a   |           |
|                                                                                                                 | PL-BG      | 1,87 ± 0,037c   |           |                                                                                                                 | CD-BG      | -0,348 ± 0,094c  |           |
|                                                                                                                 | PL-BR      | 2,038 ± 0,034b  |           |                                                                                                                 | CD-BR      | -0,371 ± 0,025c  |           |
|                                                                                                                 |            |                 |           |                                                                                                                 |            |                  |           |
| 3                                                                                                               | PL         | 3,009 ± 0,27a   | <0,001*** | 3                                                                                                               | CD         | -1,033 ± 0,304a  | 0,026*    |
|                                                                                                                 | PL-LGM     | 0,164 ± 0,894b  |           |                                                                                                                 | CD-LGM     | -2,281 ± 0,822b  |           |
|                                                                                                                 | PL-BG      | 2,594 ± 0,113a  |           |                                                                                                                 | CD-BG      | -1,034 ± 0,212a  |           |
|                                                                                                                 | PL-BR      | 3,412 ± 0,123a  |           |                                                                                                                 | CD-BR      | -0,832 ± 0,417a  |           |
|                                                                                                                 |            |                 |           |                                                                                                                 |            |                  |           |
| 7                                                                                                               | PL         | 1,51 ± 0,105c   | <0,001*** | 7                                                                                                               | CD         | -0,605 ± 0,093a  | <0,001*** |
|                                                                                                                 | PL-LGM     | 1,242 ± 0,079d  |           |                                                                                                                 | CD-LGM     | -5,111 ± 0,198d  |           |
|                                                                                                                 | PL-BG      | 1,688 ± 0,038b  |           |                                                                                                                 | CD-BG      | -2,651 ± 0,05c   |           |
|                                                                                                                 | PL-BR      | 2,562 ± 0,093a  |           |                                                                                                                 | CD-BR      | -1,782 ± 0,023b  |           |
|                                                                                                                 |            |                 |           |                                                                                                                 |            |                  |           |
| 14                                                                                                              | PL         | -0,49 ± 0,006d  | <0,001*** | 14                                                                                                              | CD         | -3,263 ± 0,062c  | <0,001*** |
|                                                                                                                 | PL-LGM     | 4,344 ± 0,054a  |           |                                                                                                                 | CD-LGM     | -8,623 ± 0,144d  |           |
|                                                                                                                 | PL-BG      | 1,038 ± 0,063b  |           |                                                                                                                 | CD-BG      | -2,636 ± 0,073b  |           |
|                                                                                                                 | PL-BR      | 0,696 ± 0,015c  |           |                                                                                                                 | CD-BR      | 12,145 ± 0,059a  |           |
|                                                                                                                 |            |                 |           |                                                                                                                 |            |                  |           |
| 28                                                                                                              | PL         | -0,604 ± 0,067d | <0,001*** | 28                                                                                                              | CD         | -7,961 ± 0,04b   | <0,001*** |
|                                                                                                                 | PL-LGM     | 16,985 ± 0,077a |           |                                                                                                                 | CD-LGM     | -12,385 ± 0,261c |           |
|                                                                                                                 | PL-BG      | 7,566 ± 0,163b  |           |                                                                                                                 | CD-BG      | -7,926 ± 0,054b  |           |
|                                                                                                                 | PL-BR      | 4,822 ± 0,099c  |           |                                                                                                                 | CD-BR      | -6,758 ± 0,038a  |           |

Values followed by different letters in the same group are significantly different at the 5% threshold of test.



| <b>Table S6c of Figure 6 C Net quantities of mineral nitrogen (g 100g<sup>-1</sup> organic nitrogen of SS and BM)</b> |            |                     |           |
|-----------------------------------------------------------------------------------------------------------------------|------------|---------------------|-----------|
| Time (days)                                                                                                           | Treatments | Means $\pm$ SD      | P value   |
| 1                                                                                                                     | SS         | 0,965 $\pm$ 0,023c  | <0,001*** |
|                                                                                                                       | SS-LGM     | 1,572 $\pm$ 0,213b  |           |
|                                                                                                                       | SS-BG      | 2,652 $\pm$ 0,071a  |           |
|                                                                                                                       | SS-BR      | 1,167 $\pm$ 0,052c  |           |
|                                                                                                                       |            |                     |           |
| 3                                                                                                                     | SS         | 3,268 $\pm$ 0,062a  | <0,001*** |
|                                                                                                                       | SS-LGM     | -0,829 $\pm$ 0,056d |           |
|                                                                                                                       | SS-BG      | 1,221 $\pm$ 0,047c  |           |
|                                                                                                                       | SS-BR      | 1,844 $\pm$ 0,084b  |           |
|                                                                                                                       |            |                     |           |
| 7                                                                                                                     | SS         | 7,134 $\pm$ 0,165a  | <0,001*** |
|                                                                                                                       | SS-LGM     | 2,272 $\pm$ 0,084b  |           |
|                                                                                                                       | SS-BG      | 1,39 $\pm$ 0,046d   |           |
|                                                                                                                       | SS-BR      | 1,965 $\pm$ 0,124c  |           |
|                                                                                                                       |            |                     |           |
| 14                                                                                                                    | SS         | 11,246 $\pm$ 0,686b | <0,001*** |
|                                                                                                                       | SS-LGM     | 13,188 $\pm$ 0,699a |           |
|                                                                                                                       | SS-BG      | 6,078 $\pm$ 0,276c  |           |
|                                                                                                                       | SS-BR      | 3,875 $\pm$ 0,043d  |           |
|                                                                                                                       |            |                     |           |
| 28                                                                                                                    | SS         | 10,366 $\pm$ 0,125b | <0,001*** |
|                                                                                                                       | SS-LGM     | 5,277 $\pm$ 0,368d  |           |
|                                                                                                                       | SS-BG      | 17,195 $\pm$ 0,09a  |           |
|                                                                                                                       | SS-BR      | 7,428 $\pm$ 0,219c  |           |

Values followed by different letters in the same group are significantly different at the 5% threshold of test.

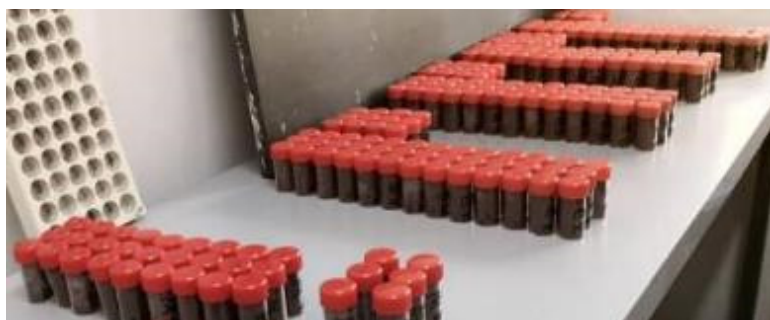

**Image S1** Microcosms prepared in triplicate

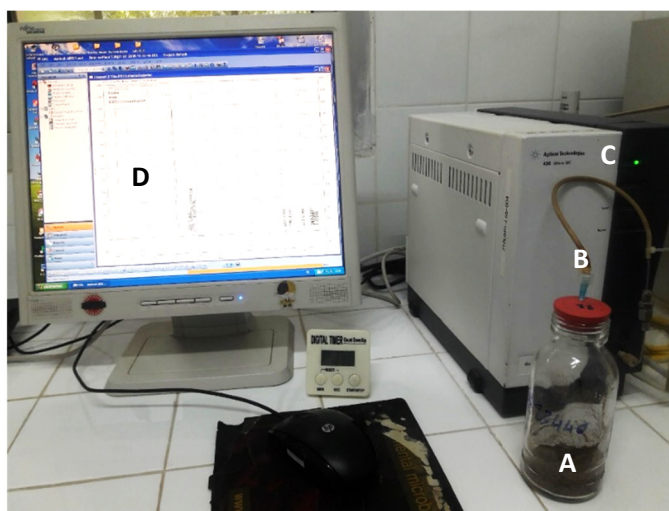

**Image S2** C-CO<sub>2</sub> measurement by gas chromatography. A Microcosm, B Microsyringe, C Chromatograph, D Chromatogram

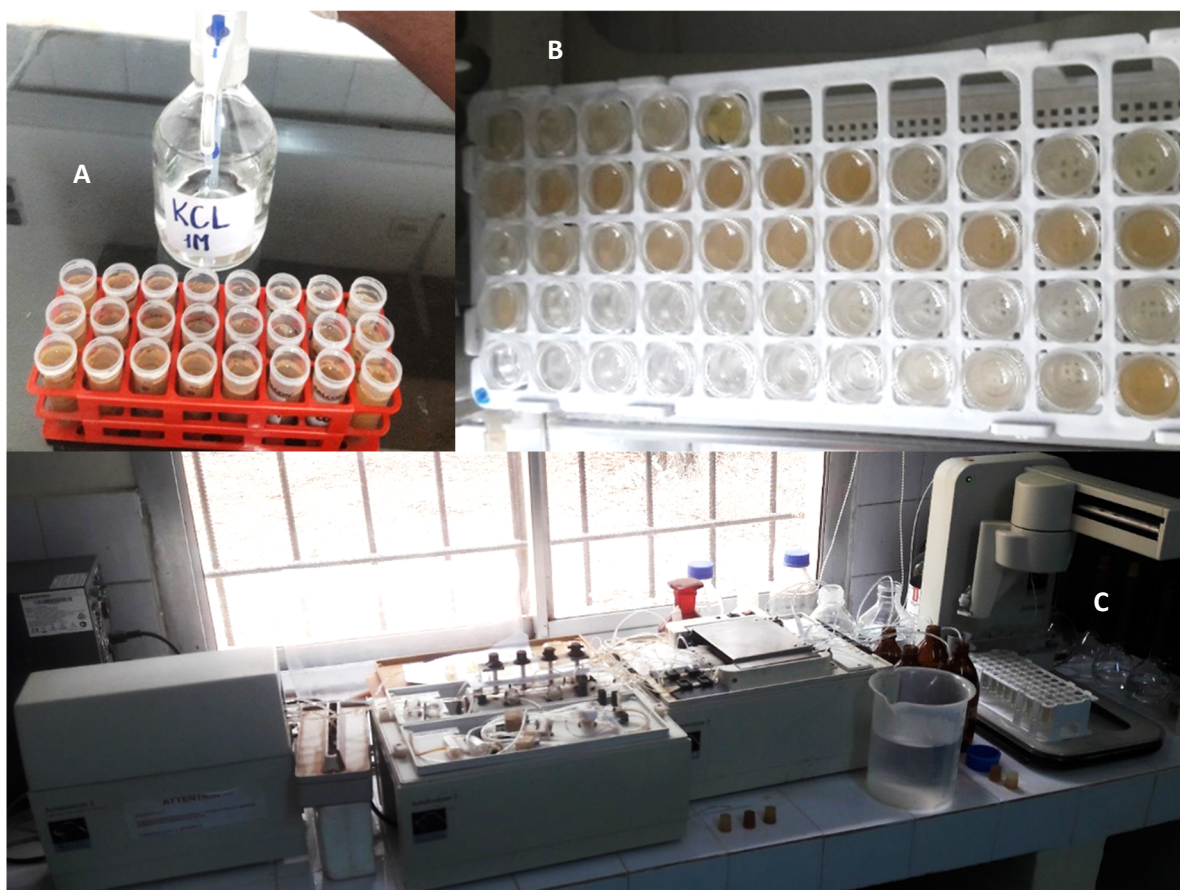

**Image S3** Measurement of  $\text{N-NO}_3^-$  and  $\text{N-NH}_4^+$  quantities. A Extraction with KCl, B Extracts, C Determination using the SEAL Technicon colorimetric analysis system
